# Supplementary material for: Brassicaceae Fungi and Chromista Diseases: Molecular Detection and Host–Plant Interaction
Source: MDPI journal article supplement (doi:10.3390/plants12051033), 2023-02-24
Supplement: s1 [file s1]

**Table S1:** Primers and probes sequences of different fungal pathogens of Brassicaceae

| Target                                        | Primers and Probes | Nucleotide sequence                  |
|-----------------------------------------------|--------------------|--------------------------------------|
| <i>Alternaria brassicicola</i>                | Acola-sens         | 5' -GCA GCA TCT GCT GTT GGG G-3'     |
|                                               | Acola-reverse      | 5' -CAA GGT CAG CAT CCA TAA AGC C-3' |
| <i>Leptosphaeria maculans</i>                 | LmacF              | 5'-CTTGCCCACCAATTGGATCCCCTA-3'       |
|                                               | LmacR              | 5'-GCAAAATGTGCTGCGCTCCAGG-3'         |
| <i>Hyaloperonospora parasitica</i>            | PpITS2F            | 5'-AAGCGTGACGATACTAATTTG-3'          |
|                                               | PpITS2R            | 5'-TGAAGTGCGGCCGAAGCTT-3'.           |
| <i>Plasmodiophora brassicae</i>               | TC1F               | 5'-GTGGTCGAACTTCATTAAATTTGGGCTCTT-3' |
|                                               | TC1R               | 5'-TTCACCTACGGAACGTATATGTGCATGTGA-3' |
| <i>Fusarium oxysporum f. sp. conglutinans</i> | Cong_PG1_F         | 5'-TGATCTTTCCAAGCTCAAGGATG-3'        |
|                                               | Cong_PG1_R         | 5'-GCTAATGACGATAGGATCAAAGTCG-3'      |
|                                               | Cong_PG1_Probe     | 5'-ACTTTTGCCACTACTGCTGA-3'           |
| <i>Sclerotinia sclerotiorum</i>               | SSaspr F           | 5'-TCAAACGCCAAAGCTGTATG-3'           |
|                                               | SSaspr R           | 5'-TCCTAGATCGACTCTCCTCCTTT-3'        |
| <i>Erysiphe cruciferarum</i>                  | EryF               | 5'-TACAGAGTGCGAGGCTCAGTCG-3'         |
|                                               | EryR               | 5'-GGTCAACCTGTGATCCATGTGACTGG-3'     |
| <i>Rhizoctonia solani</i>                     | GMRS3-R            | 5'AGT GTT ATG CTT GGT TCC ACT-3'     |
|                                               | GRSM4 <sub>M</sub> | 5'CGG TTC RTC TGC ATT TAC CTT-3'     |
|                                               | Probe: GRMP        | FAM-CRG CGT GAT AAR TTA TCT ATC GC   |
| <i>Albugo candida</i>                         | DC6                | 5'-GAG-GGA-CTT-TTGGGT-AATCA- 3       |
|                                               | LR-0               | 5'-GCT-TAA-GTT-CAGCGG-GT-3           |
| <i>Neopseudocercospora capsellae</i>          | ITS1               | 5'TTT CCG TAG GTG AAC CTG C3'        |
|                                               | ITS4               | 5'TCCTCC GCT TAT TGA TAT GC3'        |
